# Supplementary material
Source: HighWire-hosted journal article supplement (https://bmjopen.bmj.com/content/12/4/e057292)
Supplement: inline-supplementary-material-2 [file inline-supplementary-material-2.pdf]

## Appendix 2: Weighting calculation

| age         | Survey sample<br>N=1491<br>n (%) | Actual population<br>N=5264<br>n (%) | Weighting<br>(=actual<br>population/survey<br>sample) |
|-------------|----------------------------------|--------------------------------------|-------------------------------------------------------|
| 20-30 years | 222 (14.9)                       | 1220 (23.2)                          | 1220/222=5.495                                        |
| 31-40 years | 474 (31.8)                       | 1642 (31.2)                          | 1642/474=3.464                                        |
| 41-50 years | 432 (29.0)                       | 1102 (20.9)                          | 1102/432=2.551                                        |
| > 50 years  | 363 (24.3)                       | 1300 (24.7)                          | 1300/363=3.581                                        |
